# Supplementary material
Source: publisher site journal article supplement (https://www.spandidos-publications.com/1706/downloadSupplementary)

Figure S1. Correlation analysis between the percentage of the solid portion volume and age. There was no significant difference between the two variates with a Pearson correlation coefficient of 0.060 ( $P>0.05$ ). y, years.

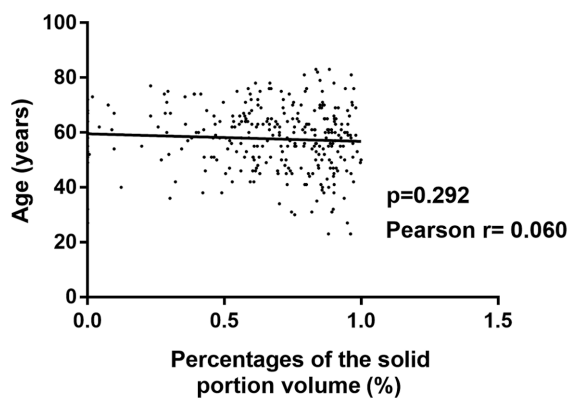

Supplement: Supplementary file 1 [file downloadSupplementary]
